# Supplementary material for: Differences in Physiological Responses of Two Tomato Genotypes to Combined Waterlogging and Cadmium Stresses
Source: MDPI journal article supplement (doi:10.3390/antiox12061205), 2023-06-02
Supplement: s1 [file s1]

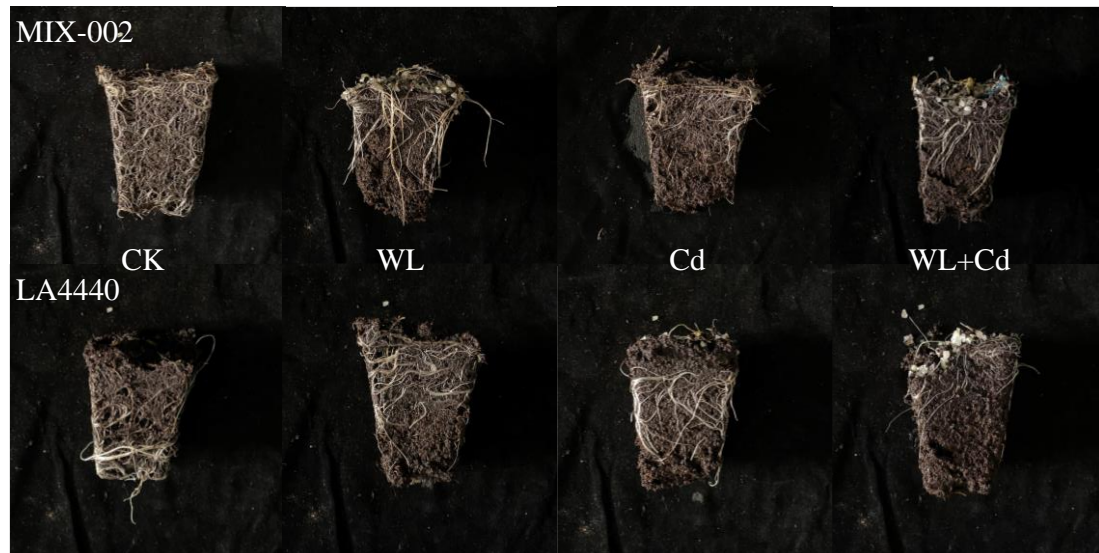

Figure S1. Root morphology of two tomato genotypes under CK, WL, Cd and WL+Cd conditions. The CK, WL, Cd and WL+Cd corresponded to control, waterlogging, cadmium and combined stress, respectively.
